# Supplementary material for: Use of an Ecosystem-Based Approach to Shed Light on the Heterogeneity of the Contamination Pattern of Listeria monocytogenes on Conveyor Belt Surfaces in a Swine Slaughterhouse in the Province of Quebec, Canada
Source: MDPI journal article supplement (doi:10.3390/pathogens10111368), 2021-10-22
Supplement: s1 [file s1]

**Table S1.** Preliminary characterization of *Listeria monocytogenes* isolates.

| Isolate ID | Serotype | InlA type | Biofilm type |          |
|------------|----------|-----------|--------------|----------|
|            |          |           | 12°C         | 30°C     |
| V2CP1A     | 1/2a     | Truncated | Weak         | Weak     |
| V2CP1B     | 3a       | Truncated | Strong       | Strong   |
| V2CP2A     | 3c       | Complete  | Weak         | Weak     |
| V2CP2B     | 3c       | Complete  | Weak         | Weak     |
| V2CP3A     | 1/2c     | Truncated | Moderate     | Moderate |
| V2CP3B     | 1/2c     | Truncated | Moderate     | Moderate |
| V2CP5A     | 1/2c     | Truncated | Moderate     | Moderate |
| V2CP5B     | 1/2c     | Truncated | Moderate     | Moderate |
| V2BO1A     | 3c       | Complete  | Weak         | Weak     |
| V2BO1B     | 3c       | Complete  | Weak         | Weak     |
| V2BO2A     | 1/2a     | Complete  | Moderate     | Moderate |
| V2BO2B     | 1/2a     | Truncated | Strong       | Strong   |
| V2BO4A     | 1/2c     | Truncated | Moderate     | Strong   |
| V2BO4B     | 1/2c     | Truncated | Moderate     | Moderate |
| V2BO5A     | 3a       | Complete  | Weak         | Weak     |
| V2BO5B     | 3a       | Complete  | Weak         | Weak     |
| V2PI4A     | 1/2a     | Truncated | Weak         | Moderate |
| V2PI4B     | 3a       | Truncated | Moderate     | Weak     |
| V3CP3A     | 1/2a     | Truncated | Strong       | Moderate |
| V3CP3B     | 1/2a     | Truncated | Moderate     | Strong   |
| V3CP5A     | 1/2a     | Truncated | Moderate     | Weak     |
| V3CP5B     | 1/2a     | Truncated | Moderate     | Moderate |
| V3CP6A     | 1/2a     | Truncated | Moderate     | Weak     |
| V3CP6B     | 1/2a     | Truncated | Weak         | Moderate |
| V3CP7A     | 1/2a     | Truncated | Strong       | Moderate |
| V3CP7B     | 3a       | Truncated | Strong       | Moderate |
| V3CP8A     | 1-2a     | Truncated | Moderate     | Strong   |
| V3CP8B     | 1/2a     | Truncated | Strong       | Strong   |
| V3BO1A     | 3a       | Truncated | Strong       | Moderate |
| V3BO1B     | 3a       | Truncated | Moderate     | Strong   |
| V3BO3A     | 1/2a     | Truncated | Strong       | Strong   |
| V3BO3B     | 1/2a     | Truncated | Moderate     | Strong   |
| V3BO4A     | 1/2a     | Truncated | Strong       | Moderate |
| V3BO4B     | 3a       | Truncated | Weak         | Weak     |
| V3BO5A     | 1/2a     | Truncated | Weak         | Strong   |
| V3BO5B     | 1/2a     | Truncated | Strong       | Strong   |
| V3BO8A     | 1/2a     | Truncated | Moderate     | Strong   |
| V3BO8B     | 1/2a     | Truncated | Strong       | Strong   |
| V3PI2A     | 1/2a     | Truncated | Moderate     | Moderate |

|        |      |           |          |          |
|--------|------|-----------|----------|----------|
| V3PI2B | 1/2a | Truncated | Moderate | Strong   |
| V3PI3A | 1/2a | Truncated | Moderate | Moderate |
| V3PI3B | 1/2a | Truncated | Moderate | Moderate |
| V4CP1A | 1/2a | Complete  | Weak     | Moderate |
| V4CP1B | 1/2a | Complete  | Weak     | Weak     |
| V4CP6A | 1/2a | Truncated | Strong   | Moderate |
| V4CP6B | 1/2a | Truncated | Strong   | Moderate |
| V4CP7A | 1/2a | Truncated | Weak     | Moderate |
| V4CP7B | 1/2a | Truncated | Weak     | Weak     |
| V4BO6A | 1/2a | Truncated | Moderate | Moderate |
| V4BO6B | 1/2a | Truncated | Moderate | Moderate |
| V4PI1A | 1/2a | Truncated | Moderate | Weak     |
| V4PI1B | 1/2a | Truncated | Moderate | Moderate |
| V5BO1A | 1/2a | Truncated | Moderate | Weak     |
| V5BO1B | 1/2a | Truncated | Weak     | Moderate |
| V5BO2A | 1/2c | Truncated | Moderate | Moderate |
| V5BO2B | 1/2c | Truncated | Moderate | Moderate |
| V5PI1A | 1/2c | Truncated | Moderate | Strong   |
| V5PI1B | 1/2c | Truncated | Strong   | Moderate |
| V5PI2A | 1/2a | Truncated | Moderate | Moderate |
| V5PI2B | 1/2a | Truncated | Strong   | Moderate |
| V5PI4A | 1/2c | Truncated | Moderate | Moderate |
| V5PI4B | 1/2c | Truncated | Strong   | Strong   |
| V5PI6A | 1/2a | Truncated | Weak     | Weak     |
| V5PI6B | 1/2a | Truncated | Strong   | Strong   |
| V6BO1A | 1/2a | Truncated | Weak     | Weak     |
| V6BO1B | 1/2a | Truncated | Strong   | Weak     |
| V6BO3A | 1/2a | Truncated | Moderate | Moderate |
| V6BO3B | 1/2a | Truncated | Moderate | Strong   |
| V6PI2A | 1/2b | Truncated | Moderate | Weak     |
| V6PI2B | 1/2b | Truncated | Weak     | Weak     |
| V6PI6A | 1/2b | Complete  | Moderate | Weak     |
| V6PI6B | 1/2c | Truncated | Moderate | Weak     |

---

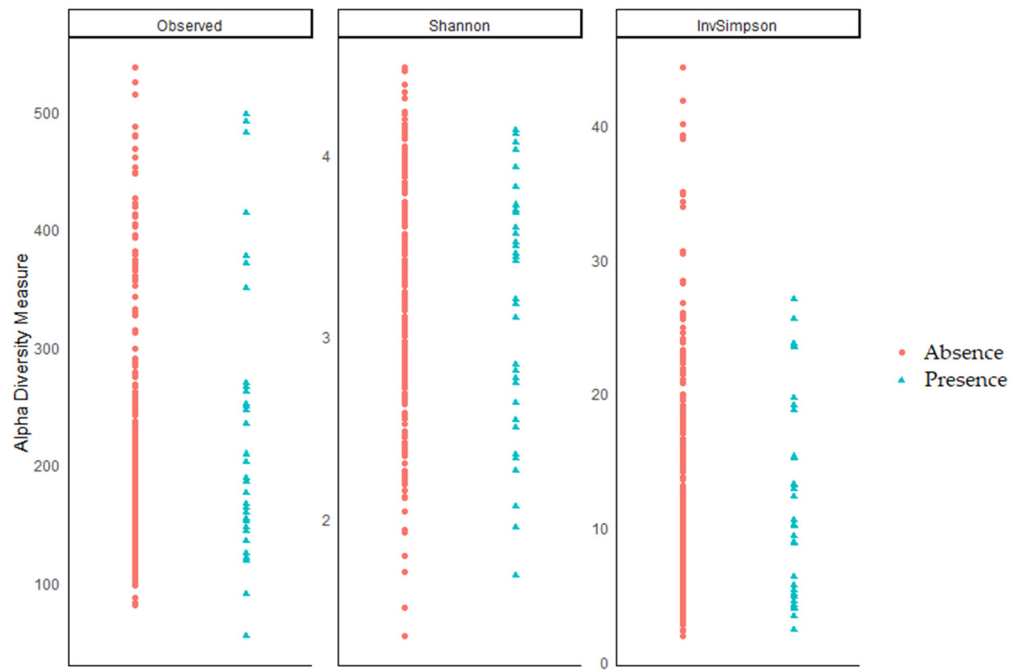

**Figure S1.** Alpha diversity comparison of the positive *Listeria monocytogenes* samples microbiota and the negative *Listeria monocytogenes* samples microbiota.

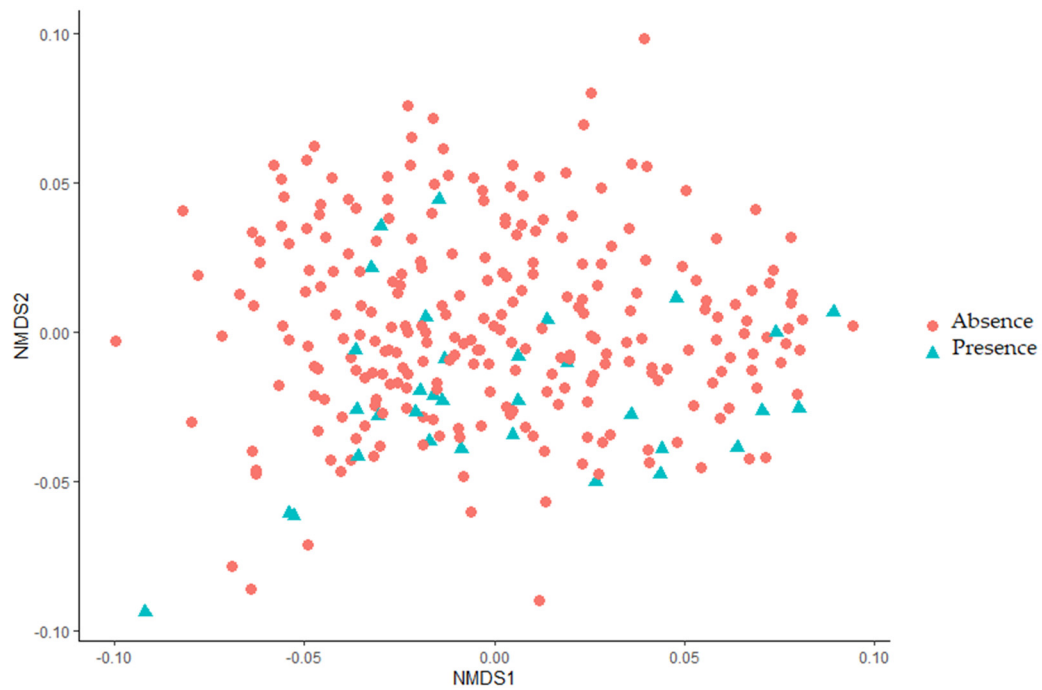

**Figure S2.** Non-Metric Multidimensional Scaling Graph (NMDS) of the microbiota structures of the *Listeria monocytogenes* positive samples and the *Listeria monocytogenes* negative samples using the Jaccard index.
